# Supplementary material for: Discovery of Potent Broad Spectrum Antivirals Derived from Marine Actinobacteria
Source: PubMed Central journal article supplement (PMC3857800; doi:10.1371/journal.pone.0082318), 2013-12-05
Supplement: pone.0082318.s004.pdf [file pone.0082318.s004.pdf]

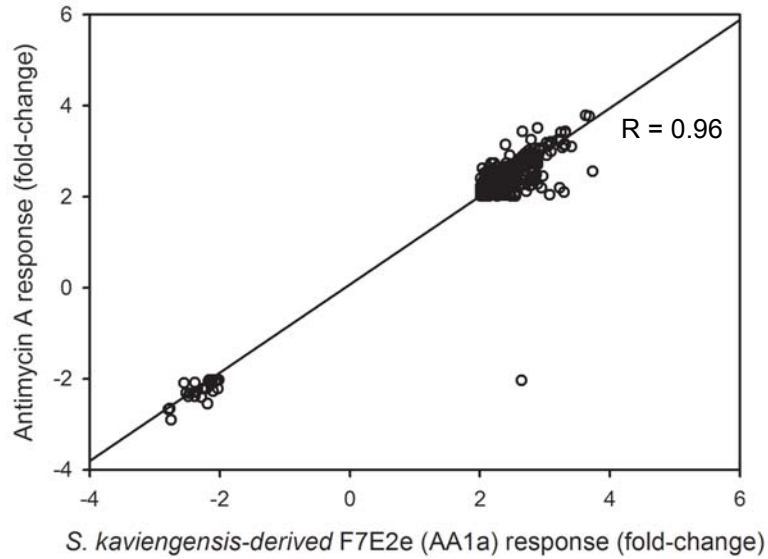

**Figure S4.** Correlation between transcriptional responses in BE(2)-C cells treated with *S. kaviengensis*-derived F7E2e or commercial antimycin A. Human BE(2)-C neuronal cells were treated with 100 ng/ml (~200 nM) F7E2e or commercial antimycin A, total RNA was harvested 24 h later, and transcriptional responses were analyzed using Affymetrix Human U133 Plus 2.0 arrays and Genomatix software. Complete lists of up- and down-regulated genes are given in Tables S2 and S3, and comparisons of co-regulated genes are provided in Table S4. The 757 genes that were co-regulated after treatment with F7E2e or commercial antimycin A and demonstrated a  $\geq 2$ -fold change are shown.
